# Supplementary material for: Effects of inorganic acids and divalent hydrated metal cations (Mg2+, Ca2+, Co2+, Ni2+) on γ-AlOOH sol–gel process
Source: Royal Society of Chemistry journal article supplement (doi:10.1039/c5cp03859f), 2015-01-01
Supplement: c5cp03859f1.pdf [file c5cp03859f1.pdf]

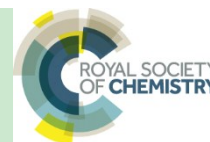

Journal Name

ARTICLE

## Supporting Information

### 1. Calculation methods

Before the single-point energy calculation, geometry optimization was done. The integration in reciprocal space was performed with a Monkhorst-Pack grid with a  $7 \times 2 \times 5$   $k$ -point used for the bulk boehmite of size  $2.90 \times 12.34 \times 3.74 \text{ \AA}^3$ . The self-consistent convergence accuracy was set at  $1 \times 10^{-5}$  eV/atom, the convergence criterion for the force between atoms was  $3 \times 10^{-2}$  eV/atom, and the maximum displacement was  $1 \times 10^{-3}$  Å.

**Table S1.** Optimized bulk lattice parameters of the  $\gamma$ -AlOOH crystal: our atomic orbital DFT calculations versus other DFT and experimental results.

| Lattice parameter (Å) | GGA + PBE | GGA + PAW | Experimental result <sup>1</sup> | Experimental result <sup>2</sup> |
|-----------------------|-----------|-----------|----------------------------------|----------------------------------|
| a                     | 2.90      | 2.90      | 2.87                             | 2.85                             |
| b                     | 12.18     | 11.97     | 12.23                            | 12.24                            |
| c                     | 3.73      | 3.71      | 3.69                             | 3.69                             |

**Table S2.** Parameters used for the calculation of the adsorption energy.

| Crystal plane                   | 100                    | 010                   | 001                    |
|---------------------------------|------------------------|-----------------------|------------------------|
| Number of atoms                 | 112 (+10) <sup>a</sup> | 68 (+10) <sup>a</sup> | 112 (+10) <sup>a</sup> |
| Slab thickness (Å)              | 15                     | 15                    | 15                     |
| Surface areas (Å <sup>2</sup> ) | 92.4                   | 43.6                  | 71.8                   |
| Surface periodicity             | $1b \times 2c$         | $2a \times 2c$        | $2a \times 1b$         |
| k-mesh                          | $1 \times 1 \times 1$  | $1 \times 1 \times 1$ | $1 \times 1 \times 1$  |

<sup>a</sup> Corresponding to three water molecules and one metal cation.

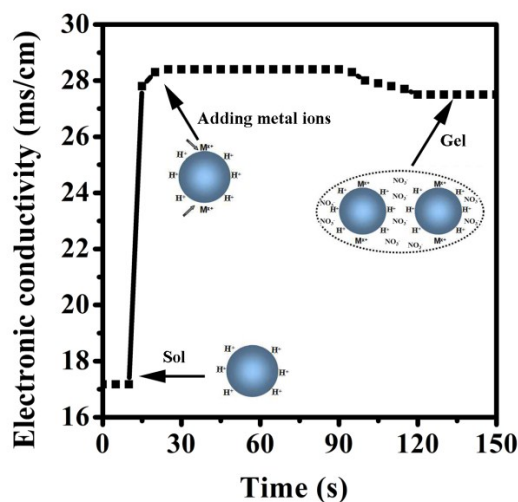

Fig. S1 The electrical conductivity change in  $\gamma$ -AlOOH sol-gel transformation.

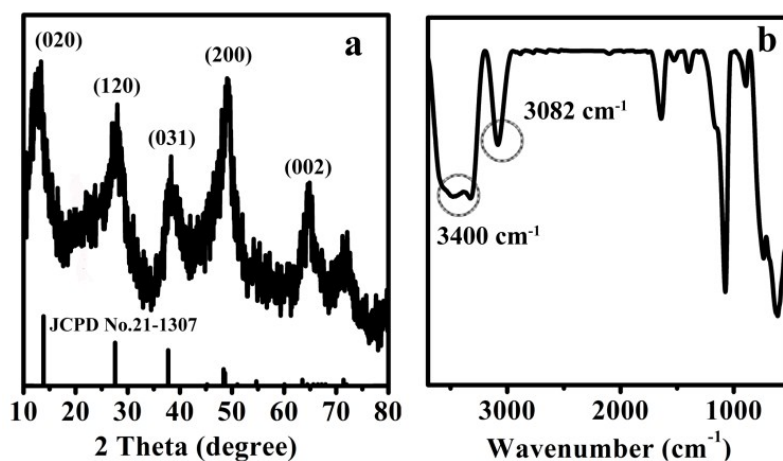

Fig. S2 The FTIR spectrum of as-prepared  $\gamma$ -AlOOH.

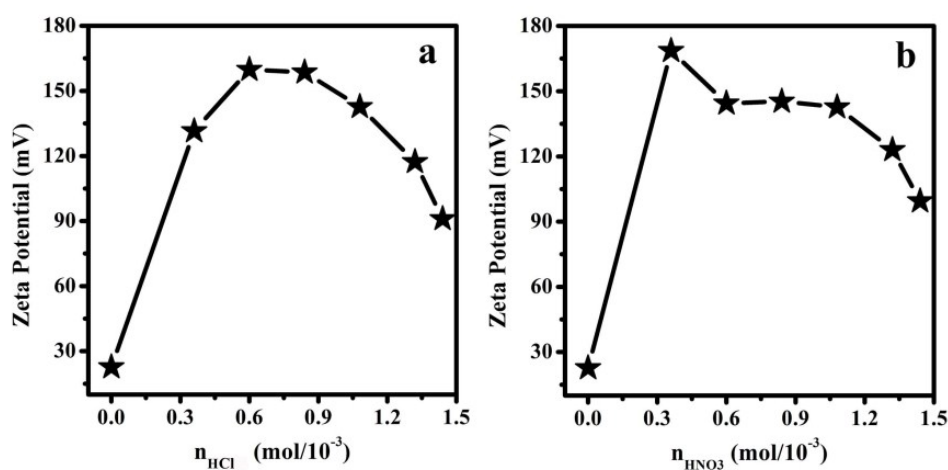

Fig. S3 Zeta potential of  $\gamma$ -AlOOH sol by adding (a) HCl and (b)  $\text{HNO}_3$ .

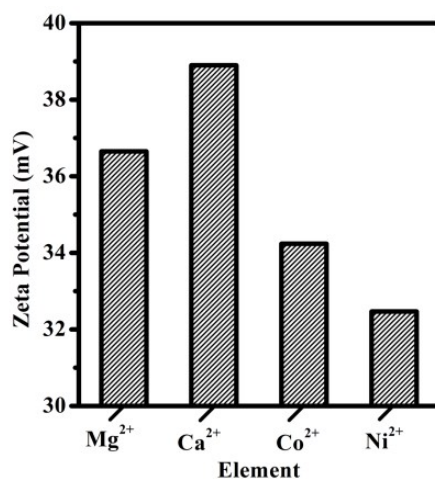

Fig. S4 Zeta potential of  $\gamma$ -AlOOH sol by adding different metal cations.

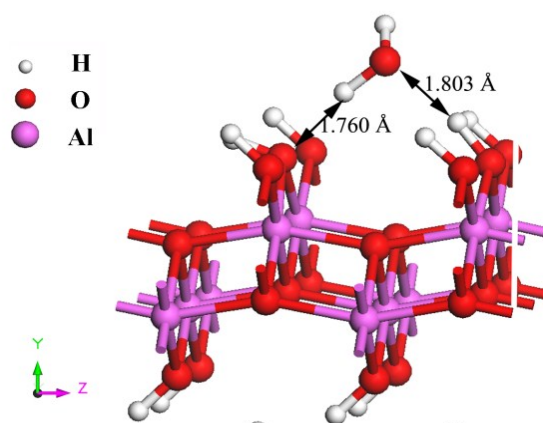

Fig.S5 Optimized structure of H2O on (010) crystal face.

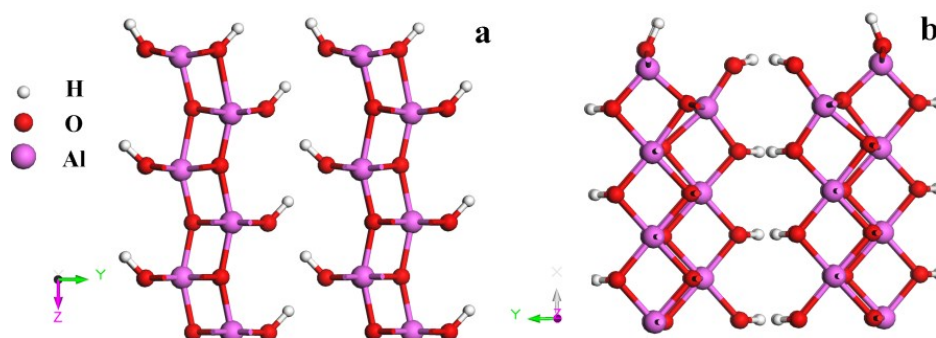

Fig. S6 Optimized structure of (a) hydroxylated (001) crystal face and (b) hydroxylated (100) crystal face.

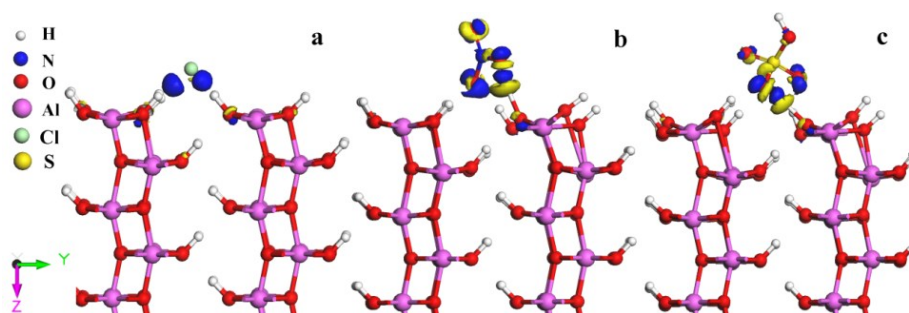

**Fig. S7** Total charge density of (a)  $\text{Cl}^-$ , (b)  $\text{NO}_3^-$  and (c)  $\text{HSO}_4^-$  on hydroxylated (001) crystal face. The blue and yellow regions represent charge accumulation and depletion, respectively.

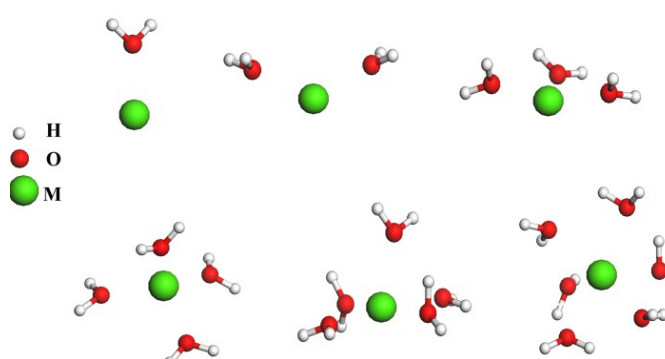

**Fig. S8** The optimized geometry of  $\text{M}^{2+}(\text{H}_2\text{O})_6$  complex ( $\text{M} = \text{Mg}, \text{Ca}, \text{Co}, \text{Ni}$ ).

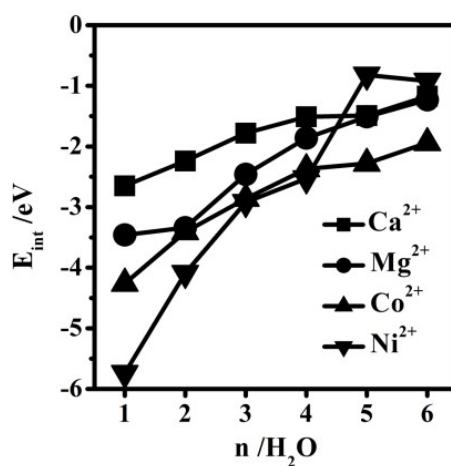

**Fig. S9** Incremental binding energies for  $\text{M}^{2+}(\text{H}_2\text{O})_6$  complex, taking  $\text{Ca}^{2+}$ ,  $\text{Mg}^{2+}$ ,  $\text{Co}^{2+}$  and  $\text{Ni}^{2+}$  as representative.

## References

1. C. E. Corbato, T. R. Tetttenhorst and G. G. Christoph, *Clay.Clay. Miner.*, 1985, **33**, 71-75.
2. P. P. Reichertz and W. J. Yost, *J. Chem. Phys.*, 1946, **14**, 495-501
